# Supplementary material
Source: PubMed Central journal article supplement (PMC6937564)
Supplement: supp_RA119.009449_152917_2_supp_417292_pzv09g.pdf [file supp_RA119.009449_152917_2_supp_417292_pzv09g.pdf]

## **Supporting information**

The sensor kinase MtrB of *Mycobacterium tuberculosis* regulates hypoxic survival and establishment of infection

Banerjee *et al.*

Three figures

Six tables

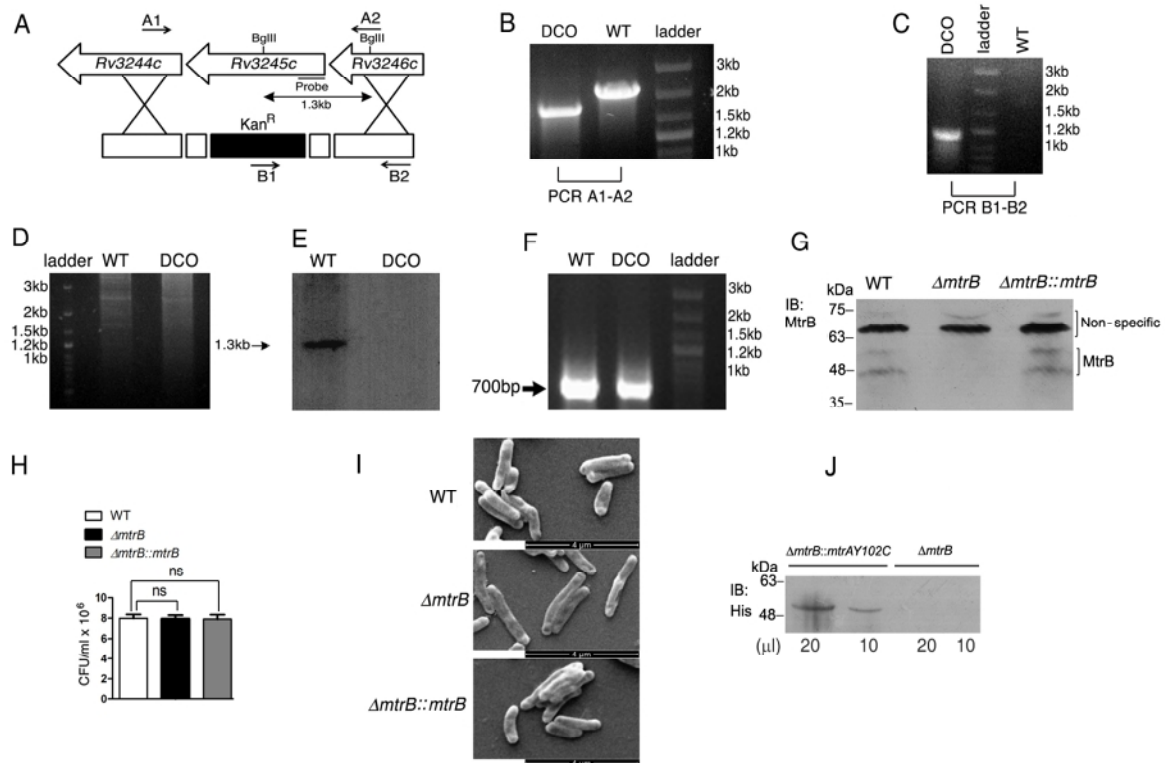

Fig. S1

**Figure S1. Verification of inactivation of *mtrB*, scanning electron microscopy and crystal violet staining.**

(A) Schematic representation of the *mtrB* (*Rv3245c*) locus on the *Mtb* H37Rv genome and strategy employed to replace *mtrB* with the kanamycin resistance gene ( $Kan^R$ ). The BglII sites and the probe used for Southern blotting are indicated. (B) Verification of the inactivation of *mtrB* with primers A1 and A2 (see Table S5). The wild type (WT) *mtrB* gene product is ~2.1 kb while the deletion strain (DCO) gene product is ~1.5kb.(C) Verification of the inactivation of *mtrB* with primers B1 and B2 (see Table S5). The deletion strain (DCO) shows a product of ~1.2kb while there is no amplification in the case of the wild type (WT). (D,E) Southern Blotting to confirm deletion of *mtrB*. The agarose gel (D) corresponding to the blot (E) confirms the absence of probe binding in *mtrB*.(F) PCR with primers P13 and P14 (see Table S5) confirms the presence of *mtrA* in the genomic DNA of *mtrB*. The deletion strain (DCO) shows the same ~700bp amplicon as the wild type (WT).(G) Complementation of MtrB in *mtrB* was confirmed by immunoblotting of bacterial lysates with MtrB antibody.(H) Bacteria was grown in the presence of 0.1% Tween 20 for the cell aggregation assay and CFUs were determined to confirm viability of bacteria. ns, non-significant. (I) Representative scanning electron micrographs of wild type (WT), *mtrB* and *mtrB::mtrB*. Images were acquired at 12000X magnification. Scale bar, 4  $\mu$ m. Images are representative of three independent experiments.(J) The expression of MtrA(Y102C) in *mtrB* was confirmed by immunoblotting. Equal numbers of bacteria [ *mtrB* alone or *mtrB* complemented with plasmid overexpressing *mtrA*(Y102C)] were lysed and different amounts of bacterial lysates [indicated in  $\mu$ l] were immunoblotted with His antibody.

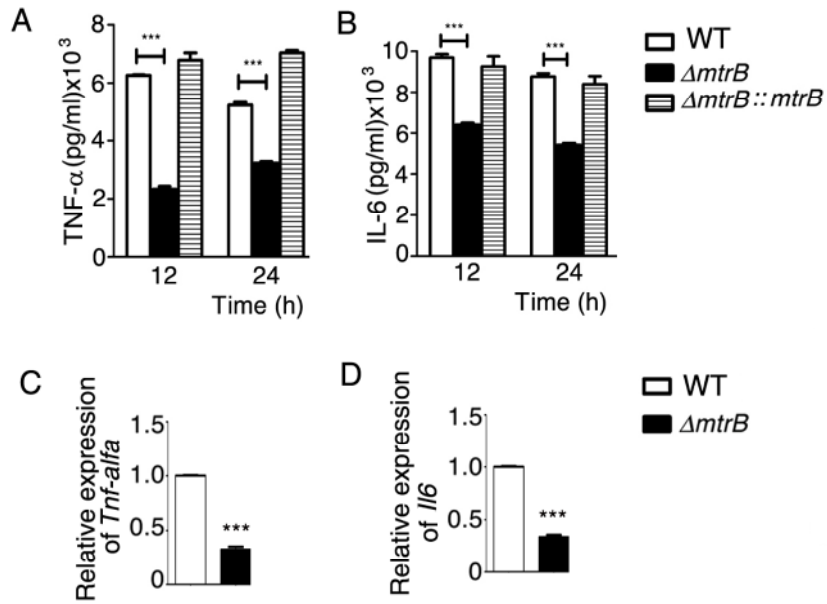

Fig. S2

**Figure S2. MtrB is required to induce a pro-inflammatory response upon infection.**

(A, B) Release of TNF- $\alpha$  (A) and IL-6 (B) was measured by ELISA from supernatants of BMDMs infected with wild type (WT),  $\Delta mtrB$  or  $\Delta mtrB::mtrB$  strains. Data represent means  $\pm$  SD of three independent experiments. \*\*\*p < 0.001.

(C, D) mRNA profiles in lungs of mice infected with WT or  $\Delta mtrB$ . *Tnf-alfa* (C) or *Il6* (D) was measured from RNA of lungs obtained after 4 weeks of infection, by qRT-PCR. *Gapdh* was used for normalization. Data represent means  $\pm$  SD (4 mice per strain), \*\*\*p < 0.001.

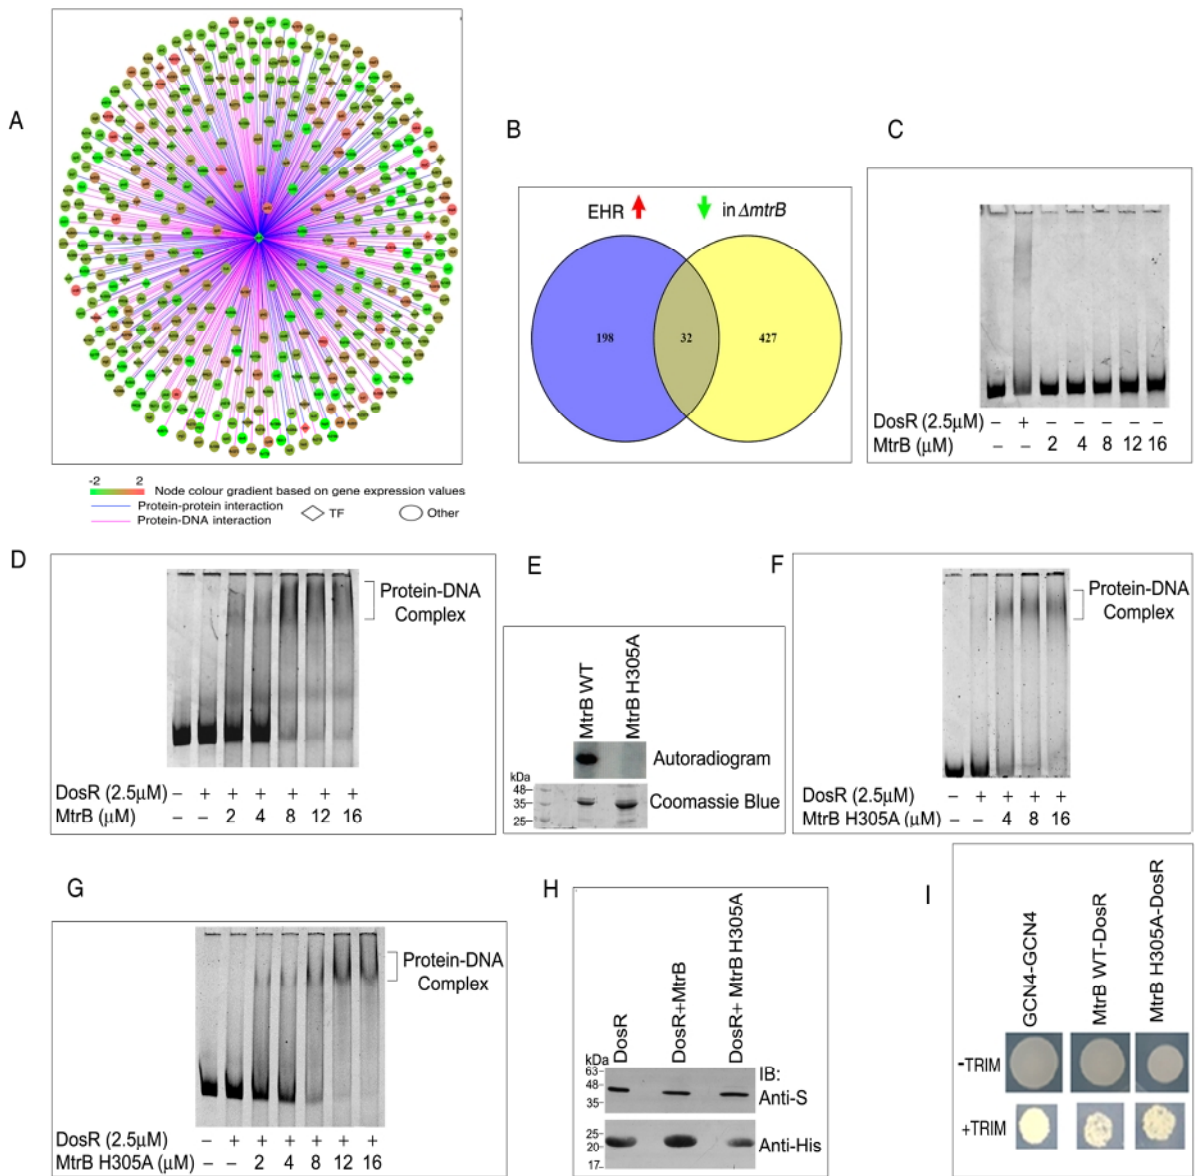

Fig. S3

**Figure S3. The *dosR* interaction network, and phosphorylation independent interaction of MtrB with DosR**

(A) The *dosR* protein-DNA and protein-protein interaction network of  $\Delta mtrB$ . The color of each node represents its expression level in *mtrB* compared to the wild type *M. tuberculosis*. Blue color edges show protein-protein interactions. Pink color edges show protein-DNA interactions. Rectangular nodes show transcription factors (TF) while circular nodes show other proteins. (B) Venn diagram representing the overlap between genes associated with long-term hypoxia (EHR), and genes downregulated in *mtrB*. Red arrow shows upregulated genes. Green arrow shows downregulated genes. (C) Binding of MtrB to the *hspX* promoter was analysed by EMSA. EMSA

was performed by incubating the PCR fragment derived from the *hspX* promoter with DosR (2.5  $\mu$ M) alone or varying concentrations of MtrB. The reaction mixture was separated by PAGE and the DNA-protein complex was visualised on a Typhoon biomolecular imager. (D) EMSA was performed by incubating the PCR fragment derived from the *dosR* promoter with DosR (2.5  $\mu$ M) in the presence of varying concentrations of MtrB. (E) Autophosphorylation of MtrB (or its mutant) was evaluated by incubation of MtrB with  $\gamma$ -<sup>32</sup>P-ATP followed by SDS-PAGE and autoradiography. (F, G) Binding of MtrB (H305A) to the *hspX* (F) or *dosR* (G) promoter was analysed by EMSA. (H) Pull down assays to analyze interaction between MtrB and DosR. S-MtrB (cytosolic domain) expressing *E. coli* lysate (or S-MtrB (H305A) (cytosolic domain)-expressing *E. coli* lysate) was incubated with His-DosR (expressed in *E. coli*) immobilized on Ni<sup>2+</sup>-NTA agarose. After washing the protein-bound resin, bound proteins were analyzed by immunoblotting with S-antibody, and reprobbed with His antibody. (I) M-PFC assay to determine association of DosR with MtrB (H305A). *M. smegmatis* expressing DosR fused to one half of mDHFR and MtrB (H305A) (cytosolic domain) fused to another half of mDHFR, was grown in the absence (-) or in the presence (+) of TRIM (20  $\mu$ g/ml). Plates were incubated at 37°C for 7 days. Growth on TRIM indicated reconstitution of DHFR, which occurs when there is interaction between the protein pair. GCN4-GCN-4 served as positive control.

**Table S1.** 101 genes that are reported to be upregulated in *M. tuberculosis* after 2-24 h infection of macrophages but were downregulated in *mtrB* compared to the wild type

| Gene    | Rv number | Fold change | Function (TubercuList)                  |
|---------|-----------|-------------|-----------------------------------------|
| acg     | Rv2032    | -4.10       | conserved hypotheticals                 |
| arsC    | Rv2643    | -1.05       | cell wall and cell processes            |
| bfrB    | Rv3841    | -3.30       | intermediary metabolism and respiration |
| ctpF    | Rv1997    | -4.94       | cell wall and cell processes            |
| cyp125  | Rv3545c   | -1.23       | intermediary metabolism and respiration |
| cysN    | Rv1286    | -1.59       | intermediary metabolism and respiration |
| desA1   | Rv0824c   | -1.52       | lipid metabolism                        |
| desA2   | Rv1094    | -1.20       | lipid metabolism                        |
| devR    | Rv3133c   | -5.03       | regulatory proteins                     |
| devS    | Rv3132c   | -4.47       | regulatory proteins                     |
| dxs2    | Rv3379c   | -1.15       | intermediary metabolism and respiration |
| fadA6   | Rv3556c   | -1.02       | lipid metabolism                        |
| fadD9   | Rv2590    | -1.24       | lipid metabolism                        |
| fdxA    | Rv2007c   | -2.81       | intermediary metabolism and respiration |
| fprB    | Rv0886    | -1.32       | intermediary metabolism and respiration |
| frdA    | Rv1552    | -1.18       | intermediary metabolism and respiration |
| gltA1   | Rv1131    | -2.03       | intermediary metabolism and respiration |
| grpE    | Rv0351    | -1.06       | virulence, detoxification, adaptation   |
| hycD    | Rv0084    | -1.52       | intermediary metabolism and respiration |
| lat     | Rv3290c   | -1.46       | intermediary metabolism and respiration |
| lhr     | Rv3296    | -0.95       | information pathways                    |
| lppN    | Rv2270    | -1.37       | cell wall and cell processes            |
| mbtG    | Rv2378c   | -1.33       | lipid metabolism                        |
| mce3C   | Rv1968    | -0.95       | virulence, detoxification, adaptation   |
| mpt70   | Rv2875    | -1.49       | cell wall and cell processes            |
| narK2   | Rv1737c   | -4.75       | cell wall and cell processes            |
| nrp     | Rv0101    | -1.20       | lipid metabolism                        |
| otsB1   | Rv2006    | -3.41       | virulence, detoxification, adaptation   |
| pdhA    | Rv2497c   | -1.28       | intermediary metabolism and respiration |
| PE34    | Rv3746c   | -0.92       | PE/PPE                                  |
| PE4     | Rv0160c   | -0.93       | PE/PPE                                  |
| pfkB    | Rv2029c   | -6.53       | intermediary metabolism and respiration |
| pks2    | Rv3825c   | -0.92       | lipid metabolism                        |
| PPE24   | Rv1753c   | -0.88       | PE/PPE                                  |
| rocA    | Rv1187    | -1.22       | intermediary metabolism and respiration |
| Rv0079  | Rv0079    | -2.39       | conserved hypotheticals                 |
| Rv0080  | Rv0080    | -4.02       | conserved hypotheticals                 |
| Rv0081  | Rv0081    | -4.35       | regulatory proteins                     |
| Rv0082  | Rv0082    | -3.50       | intermediary metabolism and respiration |
| Rv0083  | Rv0083    | -1.37       | intermediary metabolism and respiration |
| Rv0569  | Rv0569    | -3.59       | conserved hypotheticals                 |
| Rv0571c | Rv0571c   | -4.61       | conserved hypotheticals                 |
| Rv0572c | Rv0572c   | -3.53       | conserved hypotheticals                 |
| Rv0574c | Rv0574c   | -3.31       | conserved hypotheticals                 |
| Rv0575c | Rv0575c   | -1.26       | intermediary metabolism and respiration |
| Rv0823c | Rv0823c   | -1.22       | regulatory proteins                     |
| Rv0843  | Rv0843    | -1.00       | intermediary metabolism and respiration |
| Rv0885  | Rv0885    | -1.16       | conserved hypotheticals                 |
| Rv1129c | Rv1129c   | -1.19       | regulatory proteins                     |
| Rv1130  | Rv1130    | -2.63       | conserved hypotheticals                 |
| Rv1190  | Rv1190    | -1.41       | conserved hypotheticals                 |
| Rv1222  | Rv1222    | -0.99       | conserved hypotheticals                 |
| Rv1375  | Rv1375    | -0.97       | conserved hypotheticals                 |
| Rv1405c | Rv1405c   | -0.96       | intermediary metabolism and respiration |
| Rv1733c | Rv1733c   | -3.62       | cell wall and cell processes            |
| Rv1734c | Rv1734c   | -1.55       | conserved hypotheticals                 |
| Rv1735c | Rv1735c   | -2.17       | cell wall and cell processes            |
| Rv1738  | Rv1738    | -4.00       | conserved hypotheticals                 |
| Rv1739c | Rv1739c   | -1.91       | cell wall and cell processes            |
| Rv1813c | Rv1813c   | -4.64       | conserved hypotheticals                 |

|         |         |       |                                         |
|---------|---------|-------|-----------------------------------------|
| Rv1989c | Rv1989c | -1.46 | conserved hypotheticals                 |
| Rv1996  | Rv1996  | -3.40 | conserved hypotheticals                 |
| Rv1999c | Rv1999c | -4.20 | cell wall and cell processes            |
| Rv2003c | Rv2003c | -4.50 | conserved hypotheticals                 |
| Rv2005c | Rv2005c | -5.53 | conserved hypotheticals                 |
| Rv2008c | Rv2008c | -1.10 | conserved hypotheticals                 |
| Rv2012  | Rv2012  | -1.02 | conserved hypotheticals                 |
| Rv2028c | Rv2028c | -6.72 | conserved hypotheticals                 |
| Rv2030c | Rv2030c | -6.74 | conserved hypotheticals                 |
| Rv2059  | Rv2059  | -1.31 | conserved hypotheticals                 |
| Rv2557  | Rv2557  | -1.37 | conserved hypotheticals                 |
| Rv2619c | Rv2619c | -0.87 | conserved hypotheticals                 |
| Rv2620c | Rv2620c | -1.08 | cell wall and cell processes            |
| Rv2624c | Rv2624c | -5.32 | conserved hypotheticals                 |
| Rv2625c | Rv2625c | -4.98 | cell wall and cell processes            |
| Rv2626c | Rv2626c | -5.50 | conserved hypotheticals                 |
| Rv2627c | Rv2627c | -4.47 | conserved hypotheticals                 |
| Rv2628  | Rv2628  | -4.69 | conserved hypotheticals                 |
| Rv2629  | Rv2629  | -3.47 | conserved hypotheticals                 |
| Rv2630  | Rv2630  | -3.30 | conserved hypotheticals                 |
| Rv2650c | Rv2650c | -1.08 | insertion seqs and phages               |
| Rv2666  | Rv2666  | -1.35 | insertion seqs and phages               |
| Rv2897c | Rv2897c | -1.12 | conserved hypotheticals                 |
| Rv2990c | Rv2990c | -1.28 | conserved hypotheticals                 |
| Rv3115  | Rv3115  | -2.15 | insertion seqs and phages               |
| Rv3126c | Rv3126c | -0.97 | conserved hypotheticals                 |
| Rv3127  | Rv3127  | -4.64 | conserved hypotheticals                 |
| Rv3128c | Rv3128c | -2.29 | conserved hypotheticals                 |
| Rv3129  | Rv3129  | -4.52 | conserved hypotheticals                 |
| Rv3131  | Rv3131  | -3.16 | conserved hypotheticals                 |
| Rv3134c | Rv3134c | -4.79 | conserved hypotheticals                 |
| Rv3174  | Rv3174  | -1.06 | intermediary metabolism and respiration |
| Rv3289c | Rv3289c | -1.74 | cell wall and cell processes            |
| Rv3428c | Rv3428c | -1.49 | insertion seqs and phages               |
| Rv3541c | Rv3541c | -0.88 | conserved hypotheticals                 |
| Rv3660c | Rv3660c | -1.12 | virulence, detoxification, adaptation   |
| Rv3698  | Rv3698  | -1.06 | conserved hypotheticals                 |
| Rv3839  | Rv3839  | -1.26 | conserved hypotheticals                 |
| TB31.7  | Rv2623  | -4.17 | conserved hypotheticals                 |
| usfY    | Rv3288c | -1.84 | conserved hypotheticals                 |
| yrbE3B  | Rv1965  | -1.05 | virulence, detoxification, adaptation   |

**Table S2.** 32 genes reported to be acid-responsive but downregulated in *mtrB* compared to the wild type

| Gene    | Rv number | Fold change | Function (TubercuList)                  |
|---------|-----------|-------------|-----------------------------------------|
| apt     | Rv2584c   | -0.99       | intermediary metabolism and respiration |
| fadD15  | Rv2187    | -1.53       | lipid metabolism                        |
| fadD9   | Rv2590    | -1.24       | lipid metabolism                        |
| gltA1   | Rv1131    | -2.03       | intermediary metabolism and respiration |
| hpx     | Rv3171c   | -1.80       | virulence, detoxification, adaptation   |
| lat     | Rv3290c   | -1.46       | intermediary metabolism and respiration |
| lipU    | Rv1076    | -2.40       | intermediary metabolism and respiration |
| lprE    | Rv1252c   | -1.33       | cell wall and cell processes            |
| mtrA    | Rv3246c   | -1.54       | regulatory proteins                     |
| pdhA    | Rv2497c   | -1.28       | intermediary metabolism and respiration |
| pdhB    | Rv2496c   | -0.98       | intermediary metabolism and respiration |
| phoH2   | Rv1095    | -1.51       | intermediary metabolism and respiration |
| pks2    | Rv3825c   | -0.92       | lipid metabolism                        |
| regX3   | Rv0491    | -4.02       | regulatory proteins                     |
| rocA    | Rv1187    | -1.22       | intermediary metabolism and respiration |
| Rv0079  | Rv0079    | -2.39       | conserved hypotheticals                 |
| Rv0083  | Rv0083    | -1.37       | conserved hypotheticals                 |
| Rv0197  | Rv0197    | -0.98       | intermediary metabolism and respiration |
| Rv0678  | Rv0678    | -0.99       | conserved hypotheticals                 |
| Rv1130  | Rv1130    | -2.63       | conserved hypotheticals                 |
| Rv1435c | Rv1435c   | -1.32       | cell wall and cell processes            |
| Rv2159c | Rv2159c   | -1.89       | conserved hypotheticals                 |
| Rv2160c | Rv2160c   | -1.95       | regulatory proteins                     |
| Rv2161c | Rv2161c   | -1.56       | intermediary metabolism and respiration |
| Rv2256c | Rv2256c   | -1.35       | conserved hypotheticals                 |
| Rv2484c | Rv2484c   | -0.94       | conserved hypotheticals                 |
| Rv2557  | Rv2557    | -1.37       | conserved hypotheticals                 |
| Rv2558  | Rv2558    | -1.90       | conserved hypotheticals                 |
| Rv2638  | Rv2638    | -0.89       | conserved hypotheticals                 |
| Rv2867c | Rv2867c   | -1.43       | conserved hypotheticals                 |
| Rv3079c | Rv3079c   | -1.08       | conserved hypotheticals                 |
| Rv3258c | Rv3258c   | -0.96       | conserved hypotheticals                 |
| Rv3289c | Rv3289c   | -1.74       | cell wall and cell processes            |
| Rv3675  | Rv3675    | -1.03       | cell wall and cell processes            |
| Rv3848  | Rv3848    | -1.55       | cell wall and cell processes            |



**Table S3.** 71 genes that were proposed to be essential for optimal *M. tuberculosis* growth but were found to be downregulated in *mtrB* compared to the wild type.

| Gene    | Rv number | Fold change | Function (TubercuList)                  |
|---------|-----------|-------------|-----------------------------------------|
| accA2   | Rv0973c   | -1.10       | lipid metabolism                        |
| accD6   | Rv2247    | -1.01       | lipid metabolism                        |
| acpM    | Rv2244    | -1.35       | lipid metabolism                        |
| clpC1   | Rv3596c   | -0.98       | intermediary metabolism and respiration |
| cobQ2   | Rv3713    | -1.52       | intermediary metabolism and respiration |
| cspA    | Rv3648c   | -1.55       | virulence, detoxification, adaptation   |
| cydB    | Rv1622c   | -0.99       | intermediary metabolism and respiration |
| cysN    | Rv1286    | -1.59       | intermediary metabolism and respiration |
| desA1   | Rv0824c   | -1.52       | lipid metabolism                        |
| desA2   | Rv1094    | -1.20       | lipid metabolism                        |
| devS    | Rv3132c   | -4.47       | regulatory proteins                     |
| dnaB    | Rv0058    | -1.87       | information pathways                    |
| dnaJ1   | Rv0352    | -1.08       | virulence, detoxification, adaptation   |
| dxs1    | Rv2682c   | -1.07       | intermediary metabolism and respiration |
| ftsK    | Rv2748c   | -1.42       | cell wall and cell processes            |
| ftsQ    | Rv2151c   | -1.98       | cell wall and cell processes            |
| ftsW    | Rv2154c   | -1.19       | cell wall and cell processes            |
| ftsZ    | Rv2150c   | -1.39       | cell wall and cell processes            |
| gltB    | Rv3859c   | -1.26       | intermediary metabolism and respiration |
| grpE    | Rv0351    | -1.06       | virulence, detoxification, adaptation   |
| hemL    | Rv0524    | -1.33       | intermediary metabolism and respiration |
| hupB    | Rv2986c   | -1.78       | information pathways                    |
| hycP    | Rv0085    | -2.41       | intermediary metabolism and respiration |
| hycQ    | Rv0086    | -1.70       | intermediary metabolism and respiration |
| ilvE    | Rv2210c   | -1.31       | intermediary metabolism and respiration |
| kasA    | Rv2245    | -0.99       | lipid metabolism                        |
| lpqB    | Rv3244c   | -1.71       | cell wall and cell processes            |
| lsr2    | Rv3597c   | -1.45       | conserved hypotheticals                 |
| mbtG    | Rv2378c   | -1.33       | lipid metabolism                        |
| murC    | Rv2152c   | -2.00       | cell wall and cell processes            |
| murD    | Rv2155c   | -0.88       | cell wall and cell processes            |
| murF    | Rv2157c   | -1.46       | cell wall and cell processes            |
| murG    | Rv2153c   | -1.44       | cell wall and cell processes            |
| murX    | Rv2156c   | -1.82       | cell wall and cell processes            |
| pks7    | Rv1661    | -1.23       | lipid metabolism                        |
| pks8    | Rv1662    | -1.50       | lipid metabolism                        |
| PPE24   | Rv1753c   | -0.88       | PE/PPE                                  |
| PPE50   | Rv3135    | -1.61       | PE/PPE                                  |
| ppnK    | Rv1695    | -1.03       | intermediary metabolism and respiration |
| pros    | Rv2845c   | -1.00       | information pathways                    |
| pyrB    | Rv1380    | -1.13       | intermediary metabolism and respiration |
| qcrA    | Rv2195    | -1.14       | intermediary metabolism and respiration |
| ripA    | Rv1477    | -1.98       | virulence, detoxification, adaptation   |
| rocA    | Rv1187    | -1.22       | intermediary metabolism and respiration |
| rplL    | Rv0652    | -0.96       | information pathways                    |
| rpmC    | Rv0709    | -1.15       | information pathways                    |
| rpoC    | Rv0668    | -1.56       | information pathways                    |
| rpsE    | Rv0721    | -1.13       | information pathways                    |
| rpsQ    | Rv0710    | -1.23       | information pathways                    |
| Rv0208c | Rv0208c   | -1.89       | intermediary metabolism and respiration |
| Rv0236c | Rv0236c   | -1.86       | cell wall and cell processes            |
| Rv0289  | Rv0289    | -1.04       | conserved hypotheticals                 |
| Rv0290  | Rv0290    | -0.94       | cell wall and cell processes            |
| Rv0312  | Rv0312    | -1.01       | conserved hypotheticals                 |
| Rv0697  | Rv0697    | -1.02       | intermediary metabolism and respiration |
| Rv1456c | Rv1456c   | -1.01       | cell wall and cell processes            |
| Rv1738  | Rv1738    | -4.00       | conserved hypotheticals                 |
| Rv2164c | Rv2164c   | -1.79       | cell wall and cell processes            |
| Rv2166c | Rv2166c   | -1.25       | conserved hypotheticals                 |
| Rv2897c | Rv2897c   | -1.12       | conserved hypotheticals                 |

|         |         |       |                                         |
|---------|---------|-------|-----------------------------------------|
| Rv2926c | Rv2926c | -0.99 | conserved hypotheticals                 |
| Rv2927c | Rv2927c | -1.52 | conserved hypotheticals                 |
| Rv3131  | Rv3131  | -3.16 | conserved hypotheticals                 |
| Rv3267  | Rv3267  | -1.94 | conserved hypotheticals                 |
| Rv3559c | Rv3559c | -0.98 | intermediary metabolism and respiration |
| Rv3660c | Rv3660c | -1.12 | virulence, detoxification, adaptation   |
| Rv3752c | Rv3752c | -1.26 | intermediary metabolism and respiration |
| TB31.7  | Rv2623  | -4.17 | conserved hypotheticals                 |
| thrS    | Rv2614c | -1.07 | information pathways                    |
| uvrD2   | Rv3198c | -1.59 | information pathways                    |
| wag31   | Rv2145c | -0.97 | cell wall and cell processes            |

**Table S4.** 32 Genes that are upregulated during the Enduring Hypoxic Response (EHR) but are downregulated in *mtrB* compared to the wild type.

| Gene          | Rv number | Fold change | Function (TubercuList)                  |
|---------------|-----------|-------------|-----------------------------------------|
| <i>hycD</i>   | Rv0084    | -1.52       | intermediary metabolism and respiration |
| <i>nrdB</i>   | Rv0233    | -1.02       | information pathways                    |
| Rv0349        | Rv0349    | -1.30       | conserved hypotheticals                 |
| <i>dnaJ1</i>  | Rv0352    | -1.08       | virulence, detoxification, adaptation   |
| Rv0575c       | Rv0575c   | -1.26       | intermediary metabolism and respiration |
| <i>end</i>    | Rv0670    | -1.09       | information pathways                    |
| Rv0827c       | Rv0827c   | -1.74       | regulatory proteins                     |
| PE_PGRS14     | Rv0834c   | -0.91       | PE/PPE                                  |
| Rv1375        | Rv1375    | -0.97       | conserved hypotheticals                 |
| Rv1405c       | Rv1405c   | -0.96       | intermediary metabolism and respiration |
| <i>cydA</i>   | Rv1623c   | -1.87       | intermediary metabolism and respiration |
| Rv1733c       | Rv1733c   | -3.62       | cell wall and cell processes            |
| Rv1744c       | Rv1744c   | -0.94       | cell wall and cell processes            |
| Rv1760        | Rv1760    | -1.27       | conserved hypotheticals                 |
| Rv1989c       | Rv1989c   | -1.46       | conserved hypotheticals                 |
| <i>cmtR</i>   | Rv1994c   | -1.41       | Transcriptional regulator(MerR Family)  |
| Rv2012        | Rv2012    | -1.02       | conserved hypotheticals                 |
| <i>pdhA</i>   | Rv2497c   | -1.28       | intermediary metabolism and respiration |
| Rv2557        | Rv2557    | -1.37       | conserved hypotheticals                 |
| Rv2558        | Rv2558    | -1.90       | conserved hypotheticals                 |
| Rv2626c       | Rv2626c   | -5.50       | conserved hypotheticals                 |
| Rv2627c       | Rv2627c   | -4.47       | conserved hypotheticals                 |
| Rv2628        | Rv2628    | -4.69       | conserved hypotheticals                 |
| <i>arsC</i>   | Rv2643    | -1.05       | cell wall and cell processes            |
| Rv3174        | Rv3174    | -1.06       | intermediary metabolism and respiration |
| Rv3175        | Rv3175    | -1.14       | intermediary metabolism and respiration |
| <i>lat</i>    | Rv3290c   | -1.46       | intermediary metabolism and respiration |
| <i>cyp125</i> | Rv3545c   | -1.23       | intermediary metabolism and respiration |
| <i>lsr2</i>   | Rv3597c   | -1.45       | conserved hypotheticals                 |
| Rv3848        | Rv3848    | -1.55       | cell wall and cell processes            |
| <i>whiB6</i>  | Rv3862c   | -1.04       | regulatory proteins                     |
| Rv3864        | Rv3864    | -1.14       | conserved hypotheticals                 |

**Table S5.** Primers for genetic manipulations and qRT-PCR.

| <b>Primers for genetic manipulations</b> |                                    |                 |
|------------------------------------------|------------------------------------|-----------------|
| <b>Sl. No.</b>                           | <b>Primer sequence (5'- 3')</b>    | <b>Purpose</b>  |
| P1                                       | AGATATCCGCGGCCGTGCCAGCGTGACC       | Cloning         |
| P2                                       | CGTCTAGAGCCCCGTGTCATCGGGC          | Cloning         |
| P3                                       | ATAAAGCTTCCGGAATACAAGGAACGTCAG     | Cloning         |
| P4                                       | ATAACTAGTGTGACTCGCTGTGCGTCCAT      | Cloning         |
| P5                                       | ATGAATTCGGTGTTTACTCGTGATGTGCTGCT   | KO verification |
| P6                                       | AAAAAGCTTCGATTCGGTGAGGAACTGAC      | KO verification |
| P7                                       | CAGGATGAGGATCGTTTCGC               | KO verification |
| P8                                       | AGCGGCCATCGTGCCTCCCC               | KO verification |
| P9                                       | GTCACCAATCGTGTCTCGACATC            | Southern Blot   |
| P10                                      | GCGTACTGGTAGGCGGCCTG               | Southern Blot   |
| P11                                      | AGAATTCATGATCTTCGGCTCGCGCCGACGCAT  | Cloning         |
| P12                                      | AAAAAGCTTTCAACCGCTCCACTCCGCGTGCTC  | Cloning         |
| P13                                      | AGGTACCCATATGGACACCATGAGGCA        | mtrA check      |
| P14                                      | AAAAAGCTTCGGAGGTCCGGCCTTG          | mtrA check      |
| P15                                      | AAGAATTCATGTCGCGTCAGGTGGTG         | Cloning         |
| P16                                      | AAAAAGCTTCAACCGCTCCACTCCG          | Cloning         |
| P17                                      | AAGGATCCGTGGTAAAGGTCTTCTTGGT       | Cloning         |
| P18                                      | AAGGTACCATCGATTGGTCCATCACCGGGTGGCC | Cloning         |
| P19                                      | AAGGTACCCAATTGTGTCGCGTCAGGTGGTG    | Cloning         |
| P20                                      | AGAATTCATCGATACCGCTCCACTCCGCGTGCT  | Cloning         |
| <b>Primers for qRT-PCR</b>               |                                    |                 |
| <b>Primer</b>                            | <b>Sequence (5'- 3')</b>           |                 |
| pfkBtbF <sup>a</sup>                     | CCAAGCAGTATCGTTTCGTG               |                 |
| pfkBtbR <sup>b</sup>                     | GATAGTAGTCGGCAGCCACA               |                 |
| fdxA6bF                                  | GTCCTGTGTGCAGGAGTGTC               |                 |
| fdxA6bR                                  | GGTAGATCGCCTTCCCAGTA               |                 |
| Rv0080tbF                                | GTCCAGTCAATCACCTCGTG               |                 |
| Rv0080tbR                                | ATCAAGGTGTCGGCTTC                  |                 |
| Rv0081tbF                                | GTCGGTGAGTTGCTGTCCT                |                 |
| Rv0081tbR                                | GCAATCGAATAGATCATCGC               |                 |
| fadA6bF                                  | GTGCAGAACATGAGCCAGAT               |                 |
| fadA6bR                                  | AAATCTCCTGGTCGCCATAC               |                 |
| murGtbF                                  | GACGGTCGCCGAAGTATC                 |                 |
| murGtbR                                  | CATTGAGCCGCTGTTTAC                 |                 |
| ilvEtbF                                  | CGCCGCTATATCGAAGAGAT               |                 |
| ilvEtbR                                  | AATAGCCAACGCAACAACG                |                 |
| ftsZtbF                                  | ACAACTACCTGGCCGTCATC               |                 |
| ftsZtbR                                  | ATGAATTCACGCCTTTGA                 |                 |
| ftsWtbF                                  | CGTTCATCAACATCGGCTAT               |                 |

|          |                        |
|----------|------------------------|
| ftsWtbR  | GATGATGCCTATCAGCGAAA   |
| ftsQtbF  | TTGCCTTATTTTCGATGTGGA  |
| ftsQtbR  | GGCTTGCAACTTCAGGATG    |
| esxGtbF  | CGGCTCAGGCGTTTCAC      |
| esxGtbR  | CCGCCGCCACAAACC        |
| esxHtbF  | CAGGCCGCGTTGCA         |
| esxHtbR  | CTGCCACGCCTGATACGT     |
| dosRtbF  | CCGATCTGCGCTGTCTGATC   |
| dosRtbR  | GTCCAGCGCCCACATCTTT    |
| dosStbF  | TTCGGCACTCTGTACCTGAC   |
| dosStbR  | CCTTAGCCTGCTGGTAGAGC   |
| tgs1tbF  | GCTAGCTGGGCTCTCCGATGAA |
| tgs1tbR  | AACGCCTCGCTTGGATTGACA  |
| narXtbF  | TCCACACACGGGGTGAATTG   |
| narXtbR  | ATAGTCGGTCTCCTGCGTCT   |
| narK2tbF | GTGACCTGGGAGATGTCGTTT  |
| narK2tbR | ACCGTGGAGAACCCGTAGAT   |

<sup>a</sup> F stands for Forward; <sup>b</sup> R stands for Reverse.

**Table S6.** Primers for EMSA

| Primer                              | Sequence (5'- 3')         |
|-------------------------------------|---------------------------|
| <i>hspX</i> EMSA F <sup>a</sup>     | TCTGAACGGCGGTTGGCAGACAAC  |
| Cy5 <i>hspX</i> EMSA R <sup>b</sup> | CGGGAAGGGTGGTGGCCATTTGATG |
| <i>dosR</i> EMSA F                  | GTCAGCGCGGTTGTCGCGGAG     |
| Cy5 <i>dosR</i> EMSA R              | GACCTTTACCACCAGGGCACC     |

<sup>a</sup> F stands for Forward; <sup>b</sup> R stands for Reverse.
